# Supplementary material for: UHPLC-MS/SRM method for quantification of neem metabolites from leaf extracts of Meliaceae family plants
Source: Royal Society of Chemistry journal article supplement (doi:10.1039/c5ay03065j), 2016-01-01
Supplement: c5ay03065j1.pdf [file c5ay03065j1.pdf]

**UHPLC-MS/SRM Method for Quantification of Neem Metabolites  
from Leaf Extracts of Meliaceae Family Plants**

**Supplementary Data**

**Kannan Rangiah<sup>1\*</sup>, Varalaxmi BA<sup>2</sup>, Malali Gowda<sup>2\*</sup>**

*<sup>1</sup>Metabolomics Facility, Centre for Cellular and Molecular Platforms, National Centre for Biological Sciences, GKVK, Bellary Road, Bangalore-560065, India.*

*<sup>2</sup>Genomics Laboratory, Centre for Cellular and Molecular Platforms, National Centre for Biological Sciences, GKVK, Bellary Road, Bangalore-560065, India.*

\*Corresponding authors: Centre for Cellular and Molecular Platforms, GKVK, Bellary Road, Bangalore-560065, India. Fax:+ 91-80-2363 6662,  
E-mail: [kannanr@ccamp.res.in](mailto:kannanr@ccamp.res.in), [malalig@ccamp.res.in](mailto:malalig@ccamp.res.in).

**Supplementary Table 1: Extraction of neem metabolites using different solvents.**

|                     | <b>Solvents</b>        | <b>Aza A</b> | <b>Nimbin</b> | <b>Salanin</b> | <b>Azadiradione</b> | <b>Epoxy or hydroxy azadiradione</b> |
|---------------------|------------------------|--------------|---------------|----------------|---------------------|--------------------------------------|
| 5 min<br>Sonication | Methanol               | 2.83         | 95.01         | 199.48         | 125.24              | 226996.09                            |
|                     | Acetonitrile           | 2.77         | 2.20          | 28.37          | 25.14               | 56870.17                             |
|                     | Acetone                | 2.40         | -6.67         | 9.00           | 13.10               | 41836.19                             |
|                     | Ethylacetate           | 2.16         | 20.87         | 57.27          | 39.13               | 98005.54                             |
|                     | Methyltert-butyl ether | 2.95         | 71.80         | 159.53         | 92.42               | 207641.33                            |
| 1 hr at 37 °C       | Methanol               | 2.83         | 94.88         | 200.24         | 124.86              | 246959.23                            |
|                     | Acetonitrile           | 3.08         | 41.09         | 113.39         | 69.48               | 144373.88                            |
|                     | Acetone                | 2.75         | 38.14         | 106.45         | 58.98               | 151603.70                            |
|                     | EthylAcetate           | 2.30         | 53.40         | 128.04         | 80.91               | 170426.75                            |
|                     | Methyltert-butyl ether | 2.53         | 65.87         | 155.37         | 94.73               | 203949.75                            |

The amounts presented here are pg/μg of leaf extract

NF-Not found

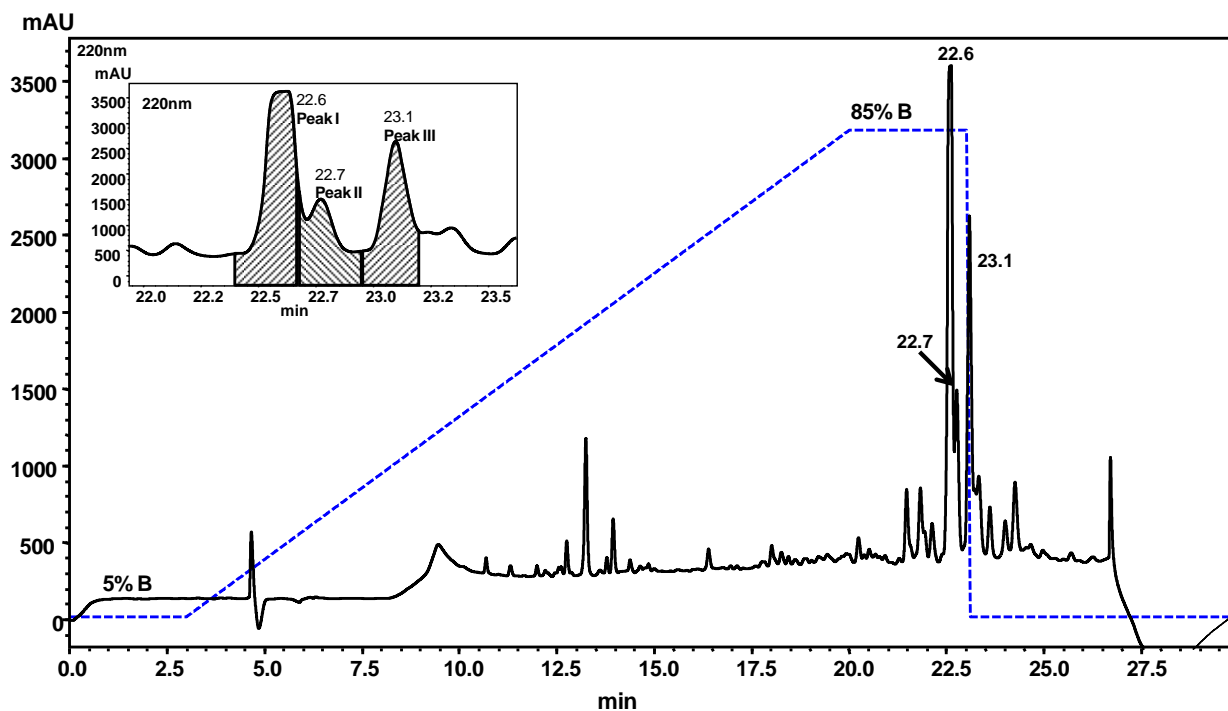

**Supplementary Figure 1: UHPLC chromatogram of neem leaf extracts.** Neem leaf extract was injected to semi preparative C-18 column with the gradient started from 5%-85% B in 3-20 min and 3 mL/min flow rate. The detection at 220 nm showed the major peaks retention time at 22.6, 22.7 and 23.1 min. The insert shows the fraction collected for the three peaks.

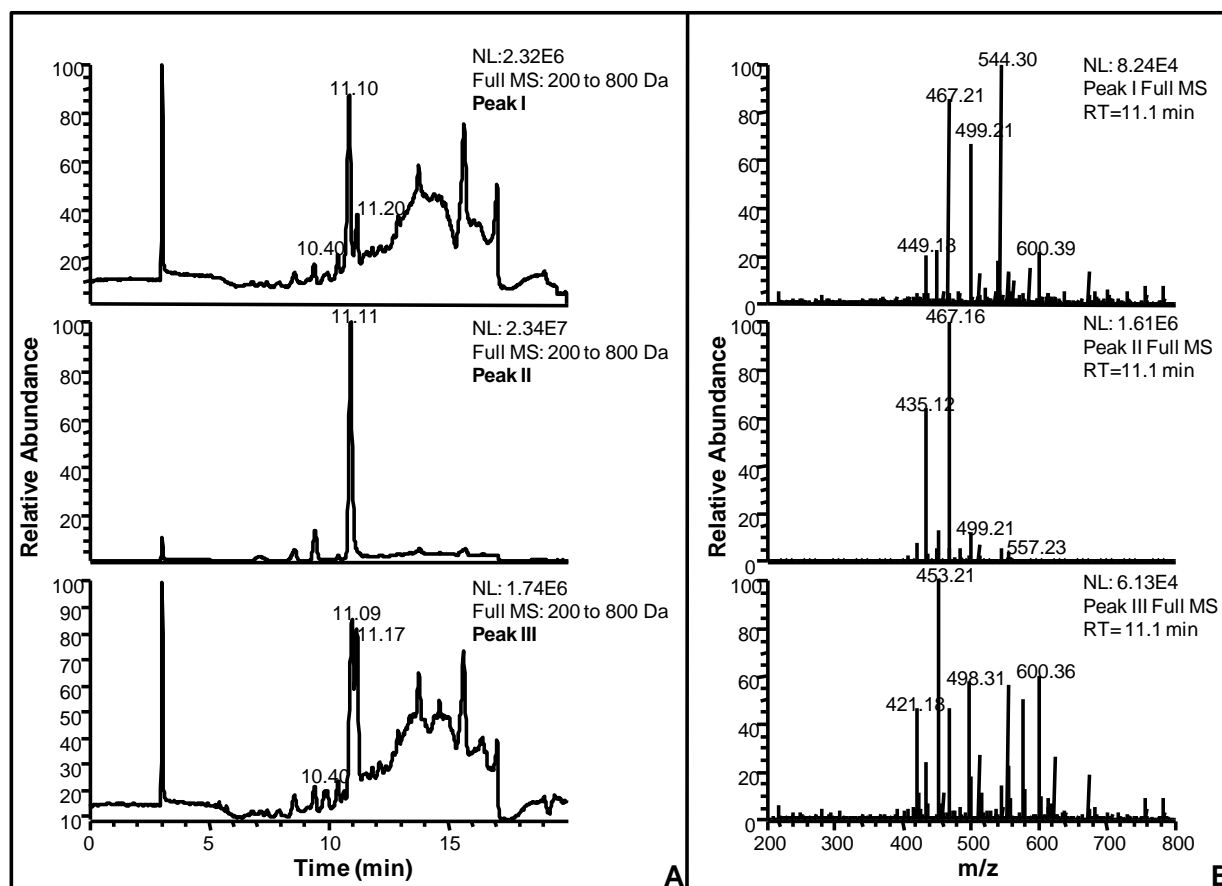

**Supplementary Figure 2: UHPLC-MS chromatogram of three peaks collected from neem leaf extract.** (A) UHPLC-MS chromatogram of all three peaks collected from neem leaf extracts, (B) the corresponding mass spectra of the peaks retention time at 11.1 min.

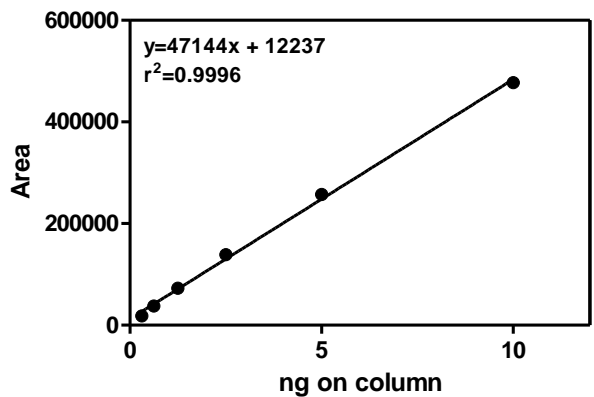

**Supplementary Figure 3: Estimation of E/H-azadi concentration.** Different concentration of azadi from 0.312 to 10 ng on column was injected and analysed in the UHPLC-MS/SRM method for both the transitions [Azadi (451→391) and E/H-azadi (467→435)]. Concentration versus area under the curve was considered to plot the standard curve. Based on this the calculated concentration of peak I (0.012 mg/mL), peak II (0.66 mg/mL) and peak III (0.009 mg/mL).

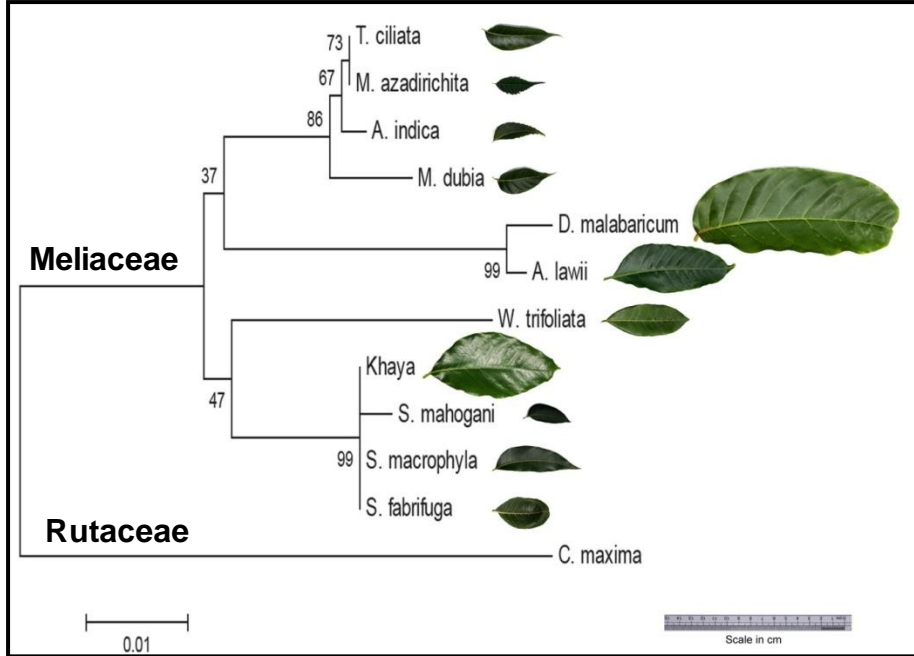

**Supplementary Figure 4: Phylogenetic analysis of Meliaceae family plants based on RuBisCo small subunit.** The eleven plants belong to Meliaceae family and one plant (Citrus maxima) belongs to Rutaceae family.

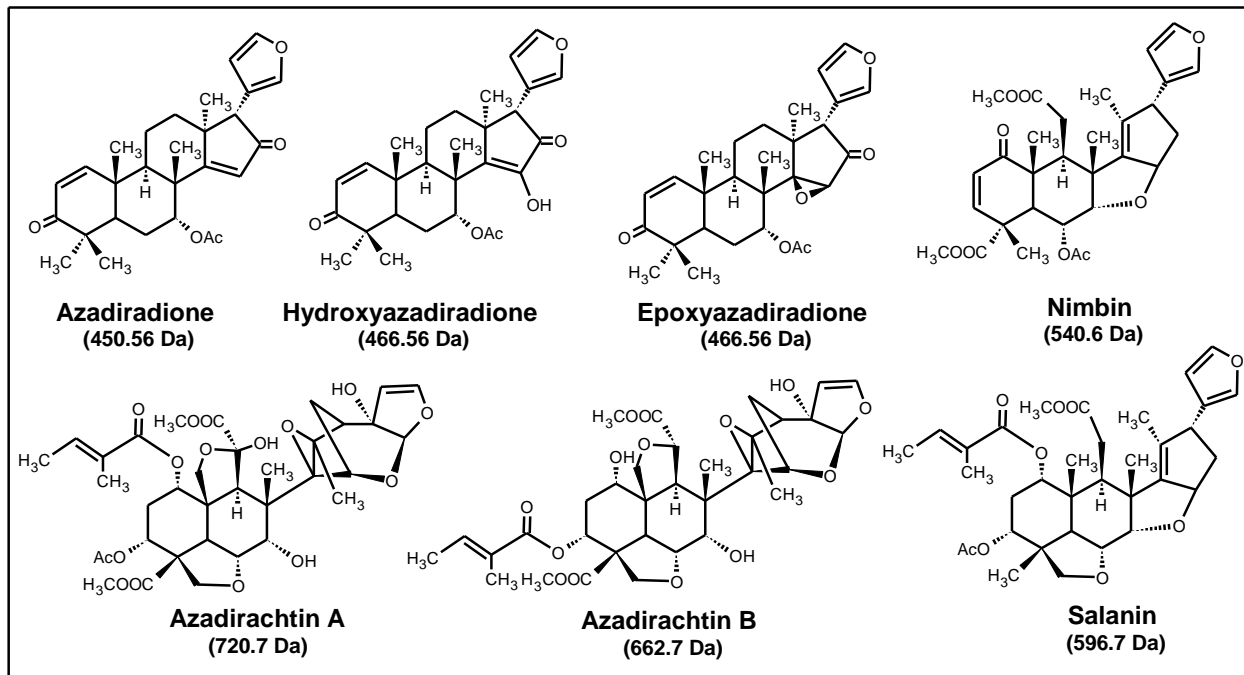

**Supplementary Figure 5: Chemical structure of neem metabolites.**
